# Supplementary material
Source: PubMed Central journal article supplement (PMC1851561)

**A2****Local Change****B1**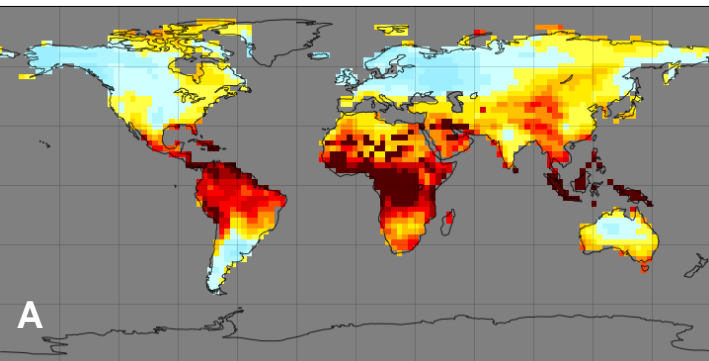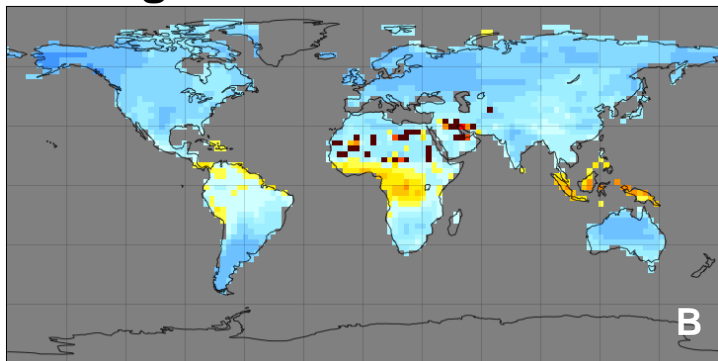**Novel Climates**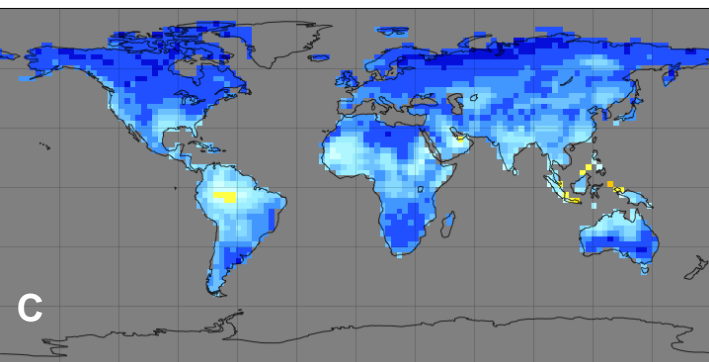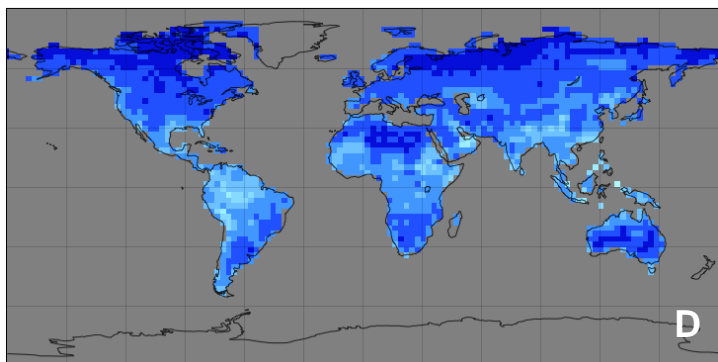**Disappearing Climates**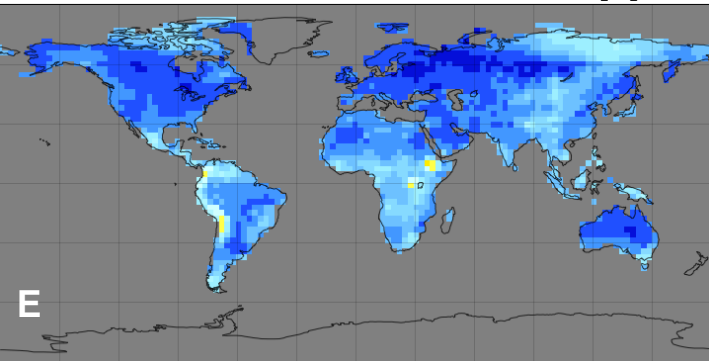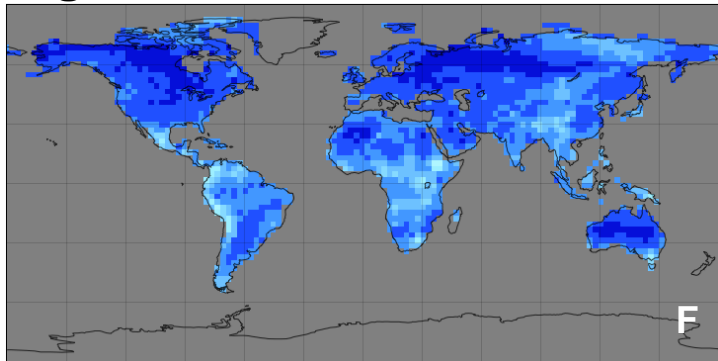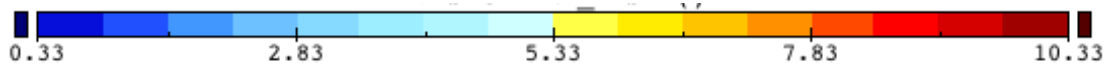

Supplement: pnas_0606292104_1.pdf [file pnas_0606292104_1.pdf]

**A2****Novel Climates****B1**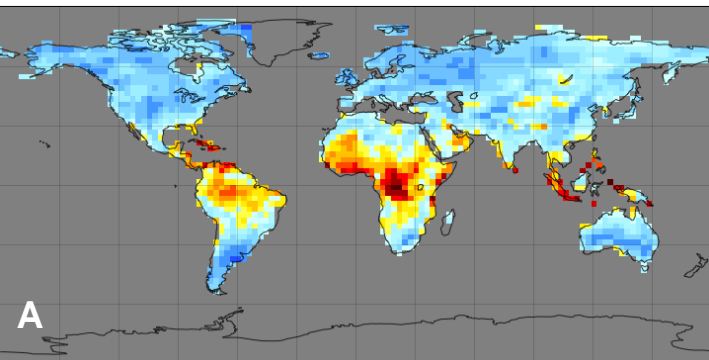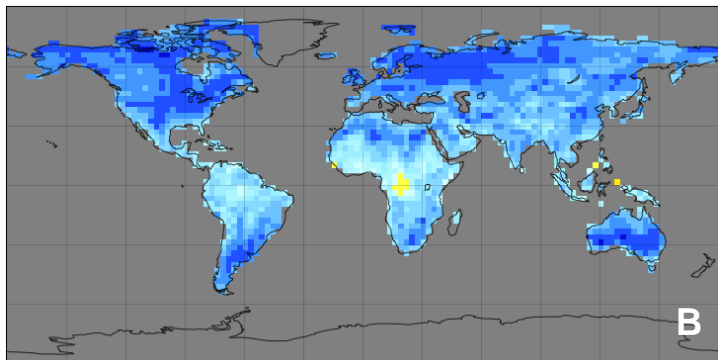**Disappearing Climates**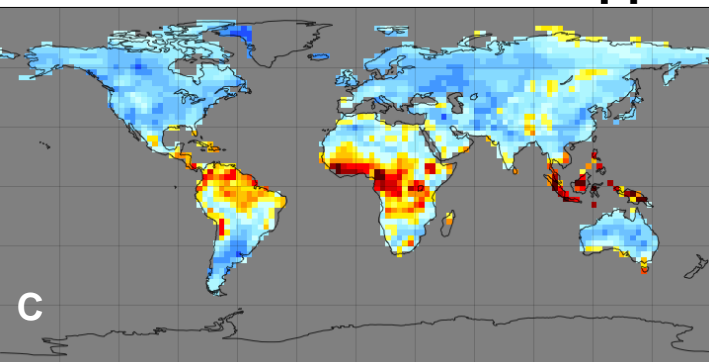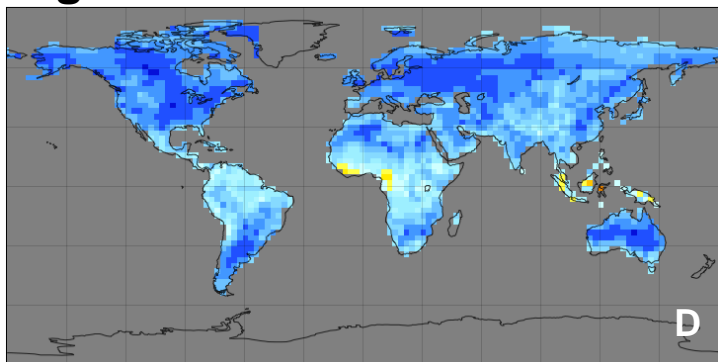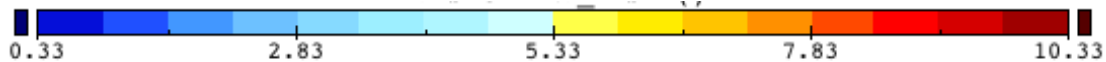

Supplement: pnas_0606292104_2.pdf [file pnas_0606292104_2.pdf]

## Local Change

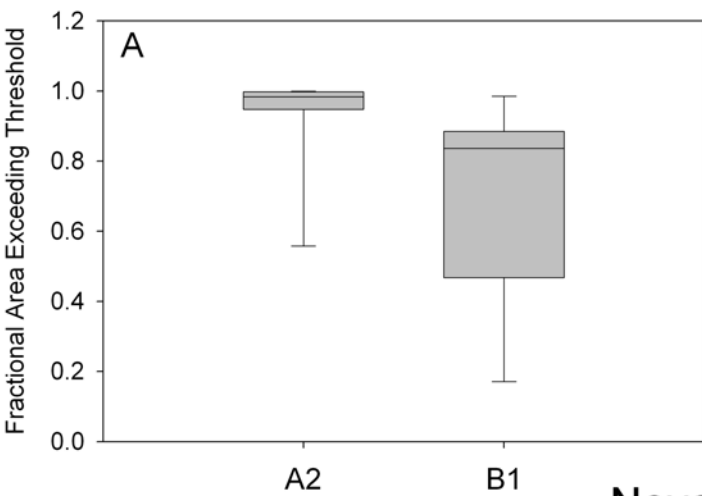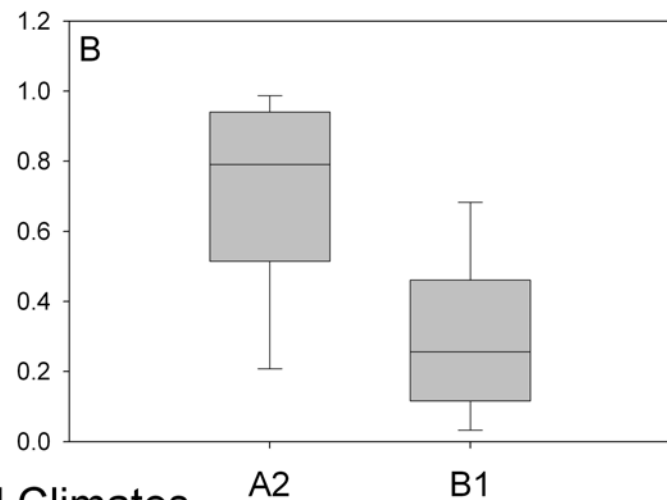

## Novel Climates

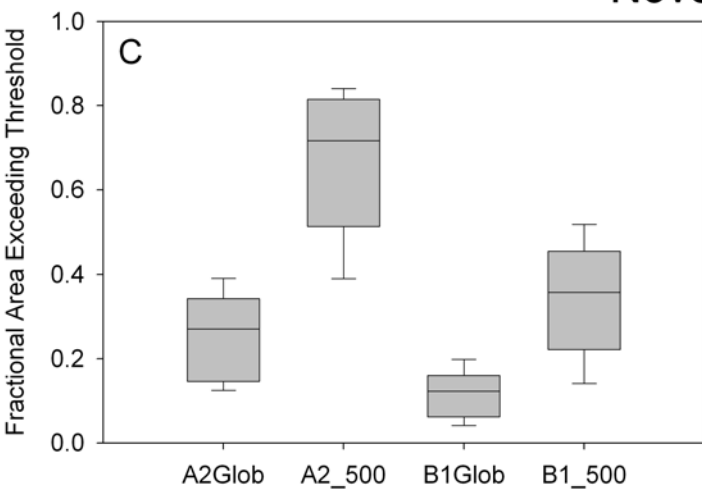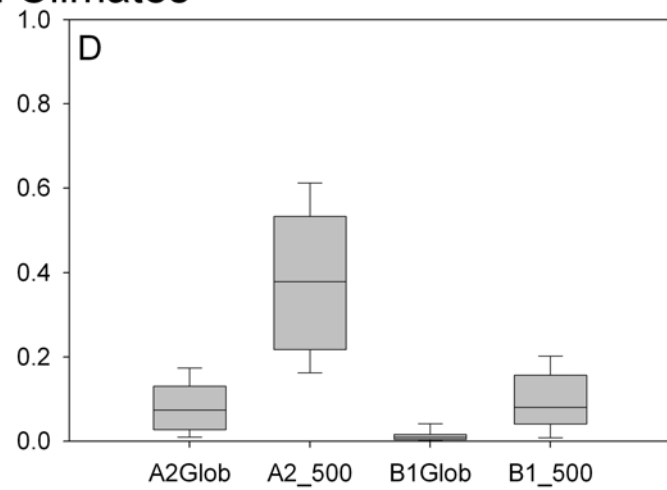

## Disappearing Climates

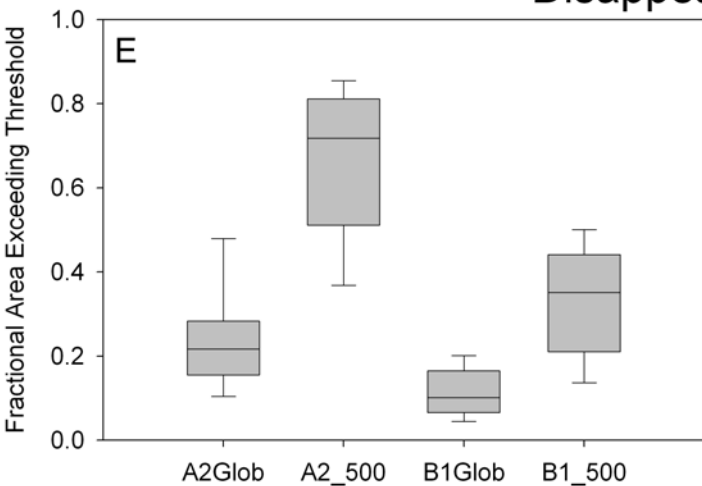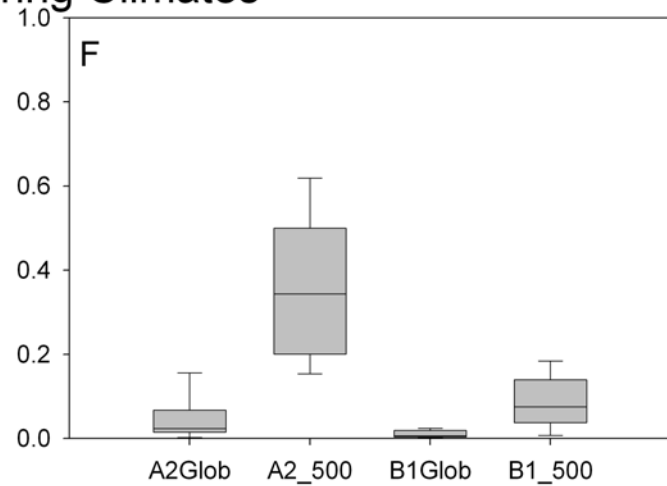

Supplement: pnas_0606292104_3.pdf [file pnas_0606292104_3.pdf]
